# Supplementary material
Source: PubMed Central journal article supplement (PMC8500528)

**Table S1. Estimates of Threshold of Clinically Important Difference by the Three Methods**

| <b>Physical Function Measure</b> | <b>Anchor-based Method</b> | <b>Estimate<sup>5</sup></b> |
|----------------------------------|----------------------------|-----------------------------|
| <b>6-minute Walking Distance</b> | Regression <sup>2</sup>    | 29.6                        |
| <b>6MWD</b>                      | ROC <sup>3</sup>           | 5.0                         |
|                                  | eCDF <sup>4</sup>          | 16.2                        |
|                                  |                            |                             |
| <b>PF10<sup>1</sup></b>          | Regression <sup>2</sup>    | 15.2                        |
|                                  | ROC <sup>3</sup>           | 5.0                         |
|                                  | eCDF <sup>4</sup>          | 10.0                        |

1. PF10, physical component of the Medical Outcomes Study, Short Form 36
2. The estimated threshold of CID is based on a regression model with PGIC response category as the primary predictor and the respective physical function measure as the outcome, adjusted for month and site
3. Receiver Operating Characteristic curve with the dichotomized PGIC as the anchor
4. Empirical Cumulative Distribution Function. Values presented are the estimated median for the shown PGIC response Category
5. For regression and eCDF methods, estimates were obtained from individuals in the 'very much/much better' PGIC response category. For ROC, estimates were obtained based on dichotomized PGIC response with the 'very much/much better' category as responders and all other PGIC responses classified as non-responders.

**Figure S1.** Percent of men achieving clinically meaningful change in walking outcome by month and treatment arm (red indicates testosterone and blue indicates placebo) in the test set using derived thresholds of clinically meaningful change from the training set: 6MWD  $\geq$  16 m (top left), 6MWD  $\geq$  30 m (top right), PF10  $\geq$  5 (bottom left), PF10  $\geq$  15 (bottom right). P-values are for the treatment arm coefficient in the generalized linear mixed model of dichotomous change in walking outcome adjusted for balancing factors: baseline testosterone, age, site, participation in three main TTrials, and use of pde-5 inhibitors.

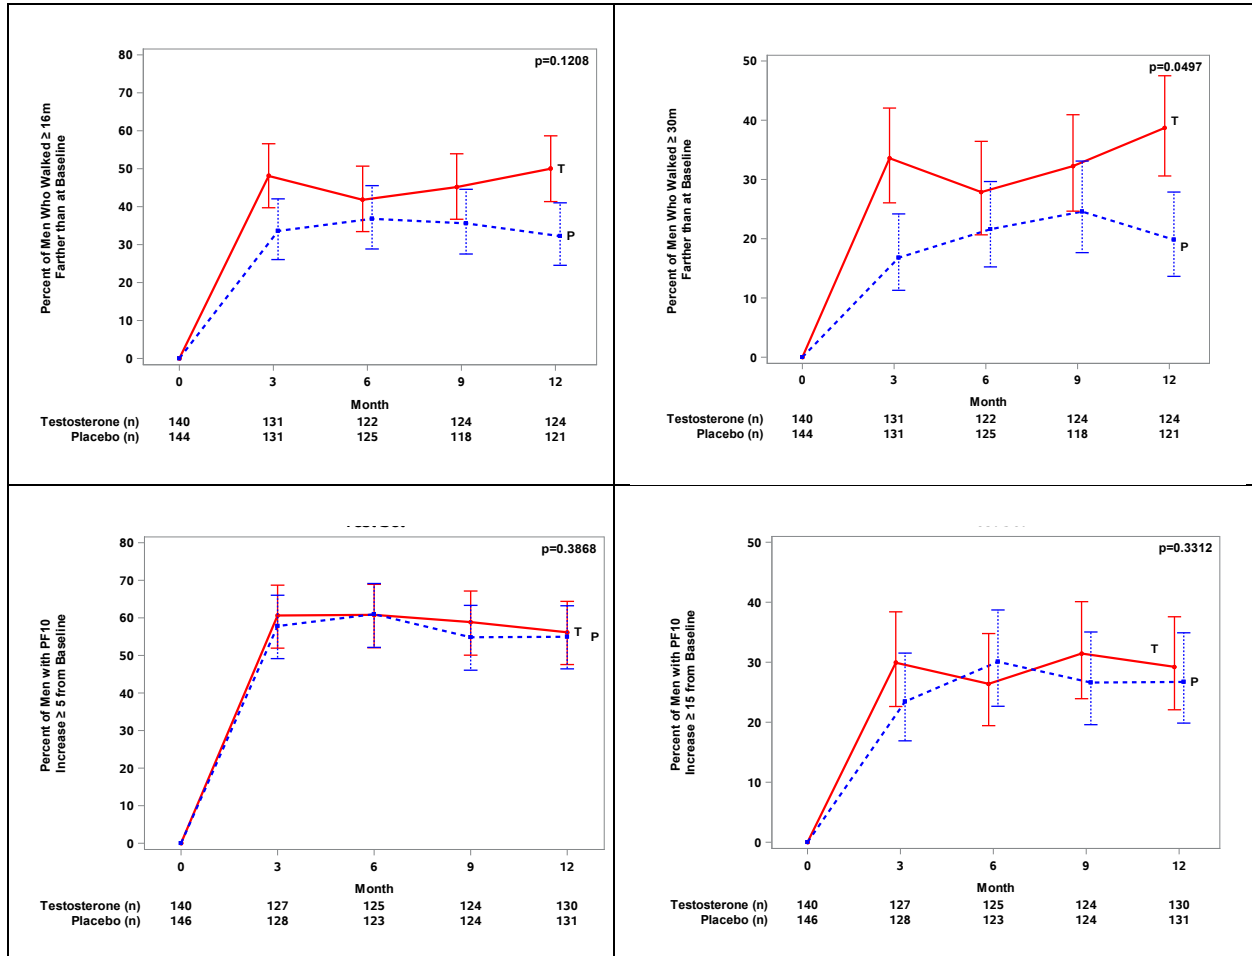

**Figure S2.** Empirical cumulative distribution function (eCDF) of change in walking outcome by arm at months 3 and 12. Each point along the eCDF curve denotes the value such that the shown proportion of subjects increased by less than or equal to the indicated amount in respective walking outcome: 6MWD, 3 months (top left); 6MWD, 12months (top, right); PF10, 3months (bottom left); PF10, 12 months (bottom right).

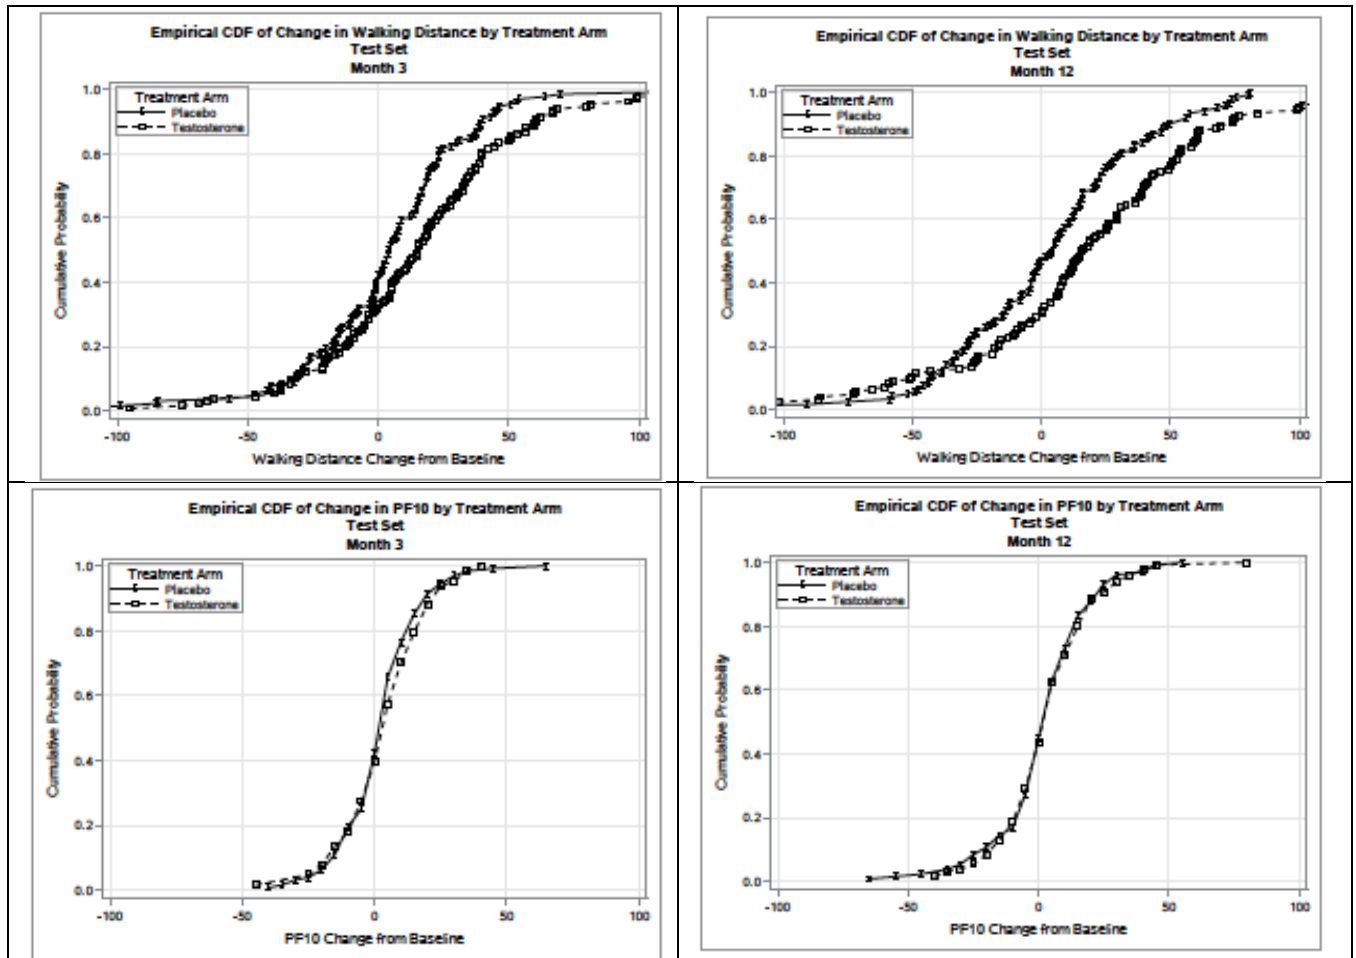

Supplement: NIHMS1717479-supplement-supinfo.pdf [file NIHMS1717479-supplement-supinfo.pdf]
